# Supplementary material for: Visible-light-responsive S-vacancy ZnIn2S4/N-doped TiO2 nanoarray heterojunctions for high-performance photoelectrochemical water splitting
Source: Royal Society of Chemistry journal article supplement (doi:10.1039/d4ta01294a), 2024-01-01
Supplement: d4ta01294a1.pdf [file d4ta01294a1.pdf]

## Supplemental Information

# Visible-light responsive S-vacancy ZnIn<sub>2</sub>S<sub>4</sub>/N-doped TiO<sub>2</sub> Nanoarrays Heterojunction for high-performance photoelectrochemical water splitting

Zhiyong Bao<sup>a</sup>, Yu Jiang<sup>a</sup>, Zhihong Zhang<sup>a</sup>, Jun Lv<sup>a\*</sup>, Wangqiang Shen<sup>a</sup>, Jiyan Dai<sup>b\*</sup>, Jiaheng Wang<sup>a</sup>, Jing Cai<sup>a</sup>, Yucheng Wu<sup>a\*</sup>

<sup>a</sup> School of Materials Science and Engineering and Anhui Provincial Key Laboratory of Advanced Functional Materials and Devices, Hefei University of Technology, Hefei 230009, China

E-mail: [lvjun117@126.com](mailto:lvjun117@126.com); [ycwu@hfut.edu.cn](mailto:ycwu@hfut.edu.cn)

<sup>b</sup> Department of Applied Physics, The Hong Kong Polytechnic University, Hong Kong.

E-mail: [jiyan.dai@polyu.edu.hk](mailto:jiyan.dai@polyu.edu.hk)

Figure S1 The XRD patterns of N-TZ-0.1.

Figure S2 SEM images of (a-b)TiO<sub>2</sub>, (c-d)N-TiO<sub>2</sub> and (e-f) Sv-ZIS

Figure S3 SEM images of (a-b) N-TZ-0.01, (c-d)N-TZ-0.05 and (e-f)N-TZ-0.1

Figure S4 Photoelectrochemical water splitting video of heterostructure photocatalyst

Figure S5 Photocatalytic H<sub>2</sub>/O<sub>2</sub> evolution performance of N-TZ-0.025

Figure S6 LSV curves of all samples under light (a) and dark (b) conditions, (c) photocurrent response, (d) electrochemical impedance spectroscopy (EIS) of all samples

Figure S7 UV-vis absorption spectra of Sv-ZIS

Figure S8 Measured IPCE in the visible-light range

Table S1 The representative research results of TiO<sub>2</sub>-based heterojunction and homojunction

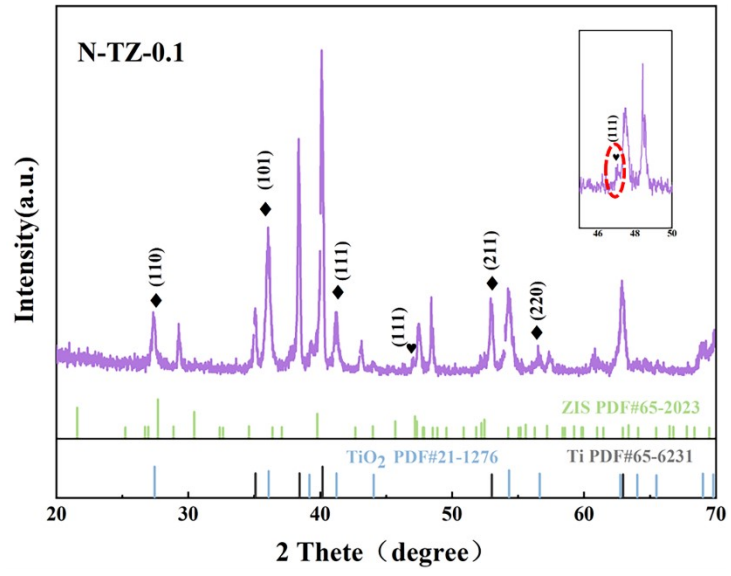

Figure S1. The XRD pattern of N-TZ-0.1.

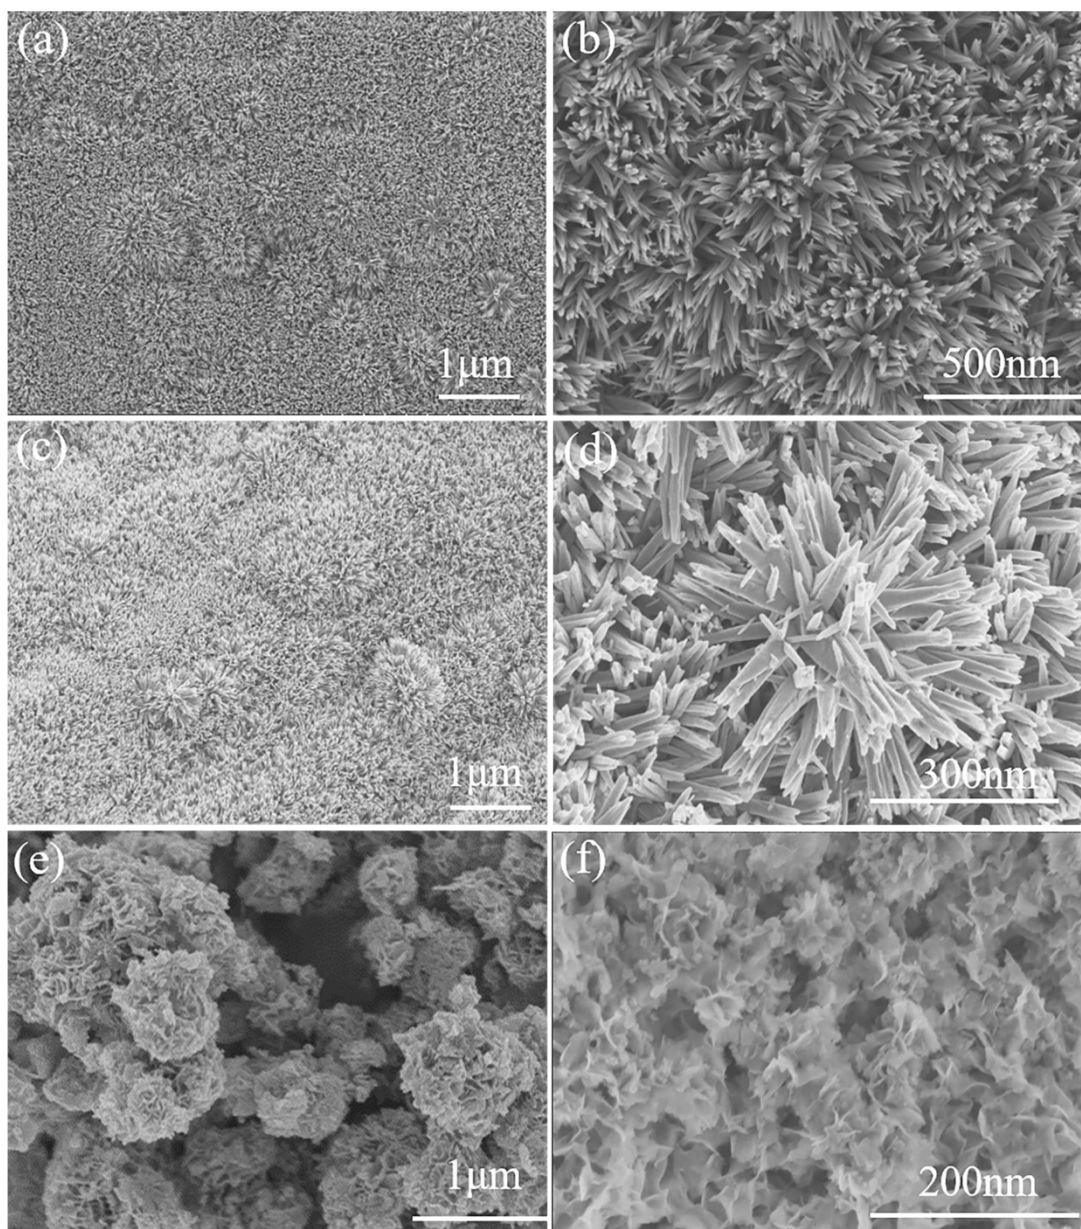

Figure S2 SEM images of (a-b) $\text{TiO}_2$ , (c-d)N- $\text{TiO}_2$  and (e-f)  $\text{S}_v\text{-ZIS}$

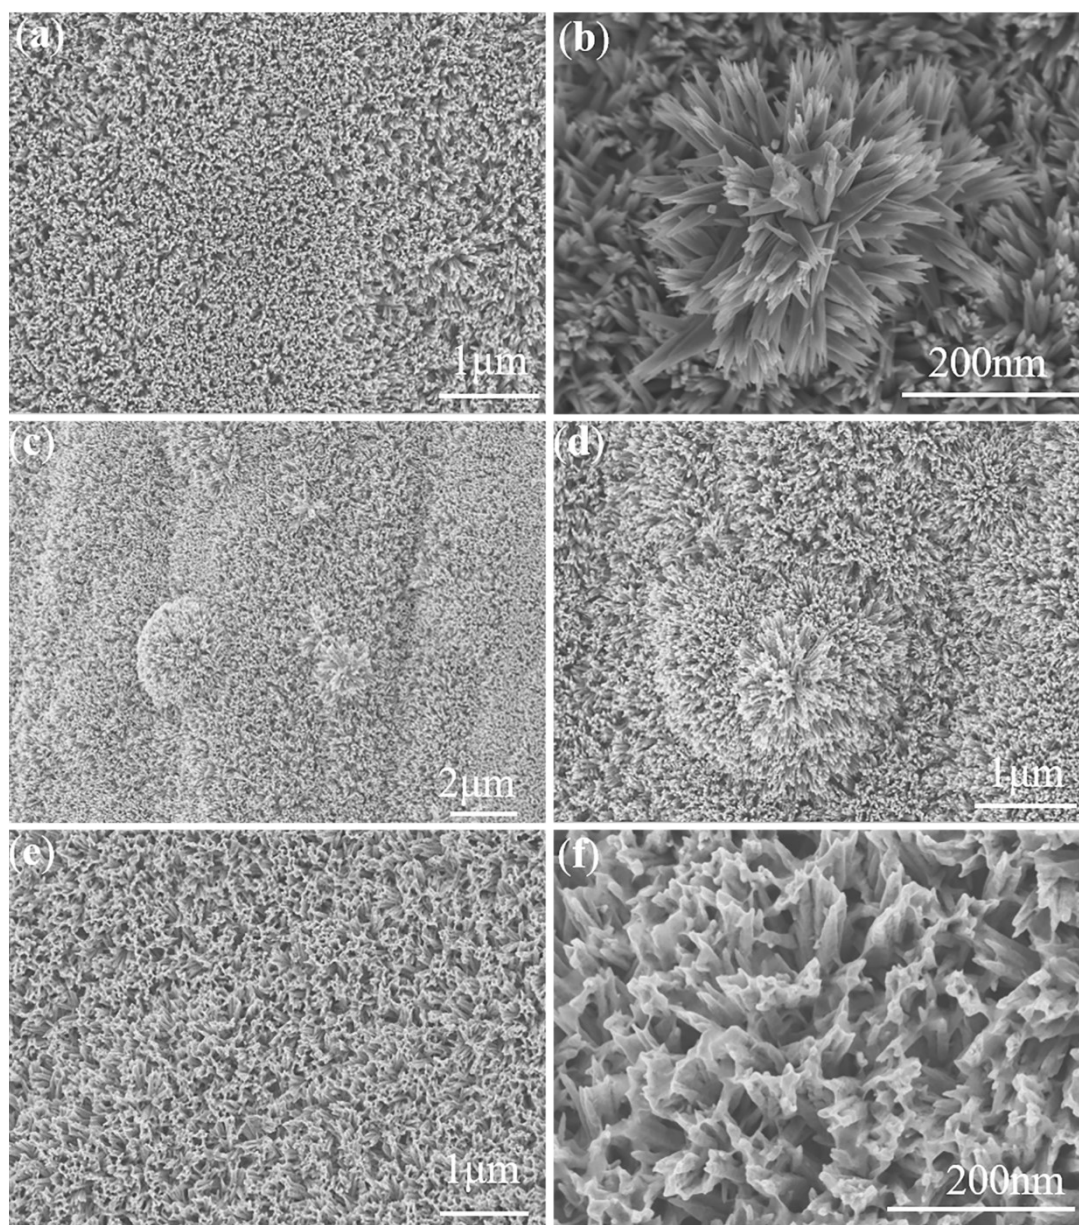

Figure S3 SEM images of (a-b) N-TZ-0.01, (c-d)N-TZ-0.05 and (e-f)N-TZ-0.1

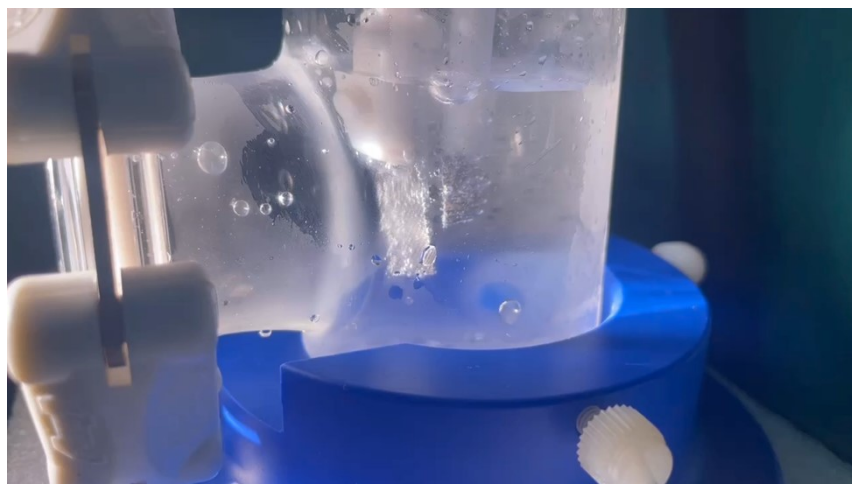

Figure S4 Photoelectrochemical water splitting video of heterostructure photocatalyst

In this video, you can see that a large number of bubbles produced by both the photocathode and the photoirradiated photoanode, especially the number of hydrogen bubbles produced by the photocathode is higher than oxygen bubbles produced by the photoanode.

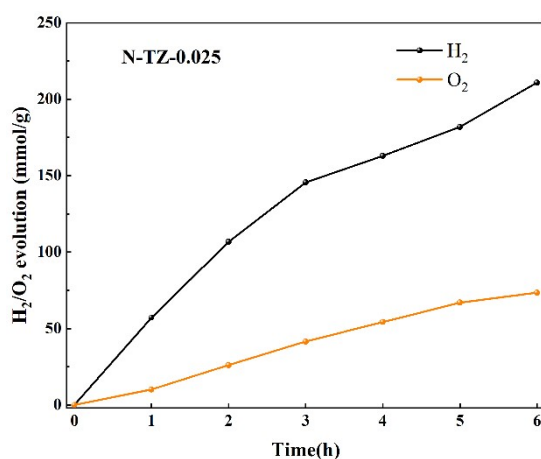

Figure S5. Photocatalytic H<sub>2</sub>/O<sub>2</sub> evolution performance of N-TZ-0.025

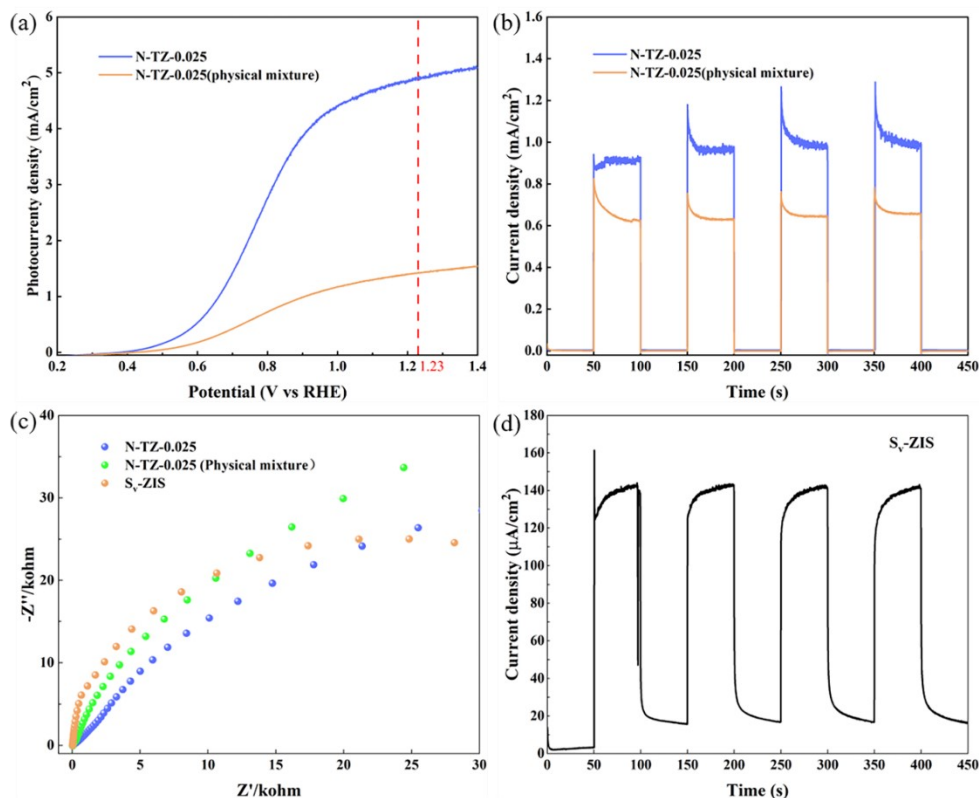

Figure S6. LSV curves (a) and photocurrent responses (b) of physically mixed N-TZ-0.025 and N-TZ-0.025 (a); (d) electrochemical impedance spectroscopy (EIS) of prepared samples; (d) photocurrent responses of pure Sv-ZIS.

As shown in Figure S6a and S6b, the photocurrent density of physically mixed N-TZ-0.025 reached  $1.2 \text{ mA/cm}^2$  at the potential of  $1.23 \text{ V vs. RHE}$ , which is much smaller than N-TZ-0.025. In Figure S6b, it is obvious to find that the physically mixed N-TZ-0.025 sample has a weaker photocurrent response than the N-TZ-0.025. In Figure S6c, the N-TZ-0.025 has a smaller arc radius, which indicates that the separation efficiency of electron-hole pairs is higher in the N-TZ-0.025 sample as the interface charge transfer is faster. Figure S6c implies the electrochemical measurements of pure Sv-ZIS, it can be seen the separation efficiency of electron-hole pairs is low and the interface charge transfer resistance is high. When coupled with the  $\text{TiO}_2$  nanocone, the i-t activity and electrochemical properties of Sv-ZIS have noticeable improvements. Figure S6d shows the i-t activity of pure Sv-ZIS and the photocurrent density was  $\sim 140 \text{ } \mu\text{A/cm}^2$  under the same conditions as its counterpart samples, indicating the carrier recombination is severe.

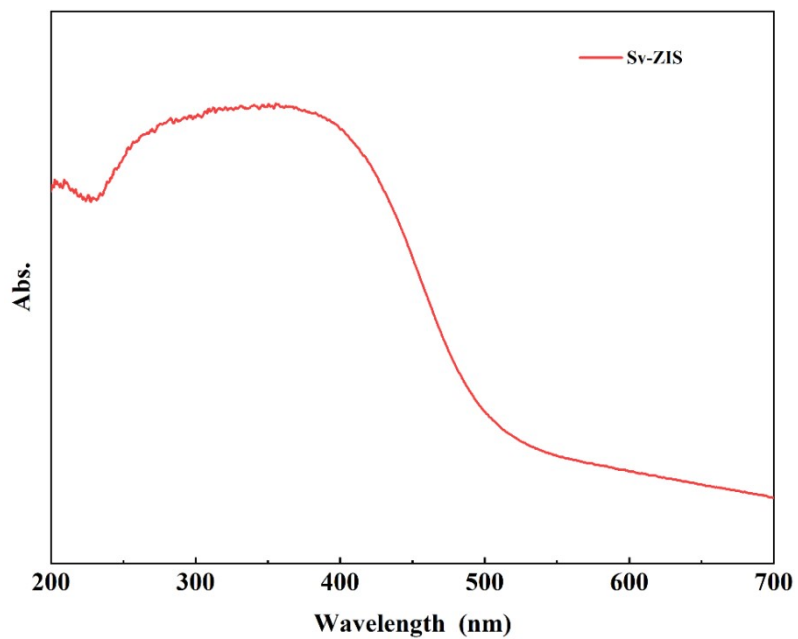

Figure S7 UV-vis absorption spectra of Sv-ZIS

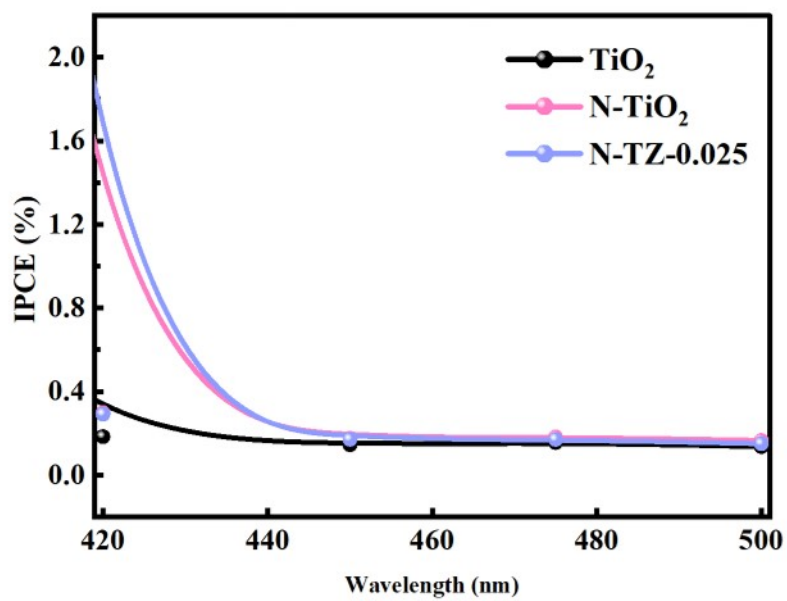

Figure S8 Measured IPCE in the visible-light range

| Photoanode                                                        | electrolyte                                                          | Photocurrent density<br>(at 1.23 V vs. RHE) | IPCE            | Ref.      |
|-------------------------------------------------------------------|----------------------------------------------------------------------|---------------------------------------------|-----------------|-----------|
| ZnIn <sub>2</sub> S <sub>4</sub> /TiO <sub>2</sub>                | 0.35M Na <sub>2</sub> SO <sub>3</sub><br>and 0.24M Na <sub>2</sub> S | 1.2 mA/cm <sup>-2</sup>                     | 21% at 380 nm   | [1]       |
| TiO <sub>2</sub> /N-CDs                                           | 1.0 M NaOH                                                           | 3.09 mA/cm <sup>-2</sup>                    | 65% at 390 nm   | [2]       |
| TiO <sub>2</sub> -V <sub>Ti</sub> /Fe <sub>2</sub> O <sub>3</sub> | 1.0 M KOH                                                            | 1.45 mA/cm <sup>-2</sup>                    | 29.8% at 340 nm | [3]       |
| TiO <sub>2</sub> @Au <sub>25</sub> /TiO <sub>2</sub>              | 0.5M Na <sub>2</sub> SO <sub>4</sub>                                 | 1.35 mA/cm <sup>-2</sup>                    | 45.2% at 318 nm | [4]       |
| Au/N-TiO <sub>2</sub>                                             | 1.0 M KOH                                                            | 2.8 mA/cm <sup>-2</sup>                     | 60.7% at 300 nm | [5]       |
| Y <sub>2</sub> O <sub>3</sub> /TiO <sub>2</sub>                   | 1.0 M KOH                                                            | 0.609 mA/cm <sup>-2</sup>                   | 22% at 350 nm   | [6]       |
| PCN/Cu-TiO <sub>2</sub>                                           | 0.2M Na <sub>2</sub> SO <sub>4</sub>                                 | 1.89 mA/cm <sup>-2</sup>                    | 31.2% at 415 nm | [7]       |
| TiO <sub>2</sub> /BiVO <sub>4</sub>                               | 0.2M Na <sub>2</sub> SO <sub>4</sub>                                 | 2.36mA/cm <sup>-2</sup>                     | 38% at 350 nm   | [8]       |
| SrTiO <sub>3</sub> /TiO <sub>2</sub> /Au                          | 1.0 M NaOH                                                           | 2.11 mA/cm <sup>-2</sup>                    | 59% at 340 nm   | [9]       |
| CuInS <sub>2</sub> /TiO <sub>2</sub>                              | 0.5M Na <sub>2</sub> SO <sub>4</sub>                                 | 1.11 mA/cm <sup>-2</sup>                    | 57.7% at 400 nm | [10]      |
| Sv-ZnIn <sub>2</sub> S <sub>4</sub> /N-TiO <sub>2</sub>           | 0.5M Na <sub>2</sub> SO <sub>4</sub>                                 | 4.9 mA/cm <sup>-2</sup>                     | 57.9% at 350 nm | This work |

Table S1 The representative IPCE results of TiO<sub>2</sub>-based photocatalysts.

## References

- [1] Liu Q, Lu H, Shi Z, et al. 2D ZnIn<sub>2</sub>S<sub>4</sub> Nanosheet/1D TiO<sub>2</sub> Nanorod Heterostructure Arrays for Improved Photoelectrochemical Water Splitting [J]. ACS Applied Materials & Interfaces, 2014, 6(19): 17200-7.
- [2] Han Y, Wu J, Li Y, et al. Carbon dots enhance the interface electron transfer and photoelectrochemical kinetics in TiO<sub>2</sub> photoanode [M]. Applied Catalysis B: Environmental, 2022, 304: 120983.
- [3] Li F, Jian J, Zou J, et al. Bulk embedding of Ti-defected TiO<sub>2</sub> nano-heterointerfaces in hematite photoanode for boosted photoelectrochemical water splitting [J]. Chemical Engineering Journal, 2023, 473: 145254
- [4] Huo S, Wu Y, Zhao C, et al. Core-Shell TiO<sub>2</sub>@Au<sub>25</sub>/TiO<sub>2</sub> Nanowire Arrays Photoanode for Efficient Photoelectrochemical Full Water Splitting [J]. Industrial & Engineering Chemistry Research, 2020, 59(32): 14224-33.
- [5] Liang Z, Chen D, Xu S, et al. Synergistic promotion of photoelectrochemical water splitting efficiency of TiO<sub>2</sub> nanorod arrays by doping and surface modification [J]. Journal of Materials Chemistry C, 2021, 9(36): 12263-72.
- [6] Sharma S, Shanmugam R, Harikrishna R B, et al. Y<sub>2</sub>O<sub>3</sub> electrodeposited TiO<sub>2</sub> nanotube arrays as photoanode for enhanced photoelectrochemical water splitting [J]. International Journal of Hydrogen Energy, 2024, 52: 1415-27.
- [7] Wang L, Si W, Ye Y, et al. Cu-ion-implanted and polymeric carbon nitride-decorated TiO<sub>2</sub> nanotube array for unassisted photoelectrochemical water splitting [M]. ACS Publications, 2021: 44184-44194.
- [8] Guo Z, Wei J, Zhang B, et al. Construction and photoelectrocatalytic performance of TiO<sub>2</sub>/BiVO<sub>4</sub> heterojunction modified with cobalt phosphate [M]. Journal of Alloys and Compounds, 2020, 821: 153225.
- [9] Cheng X, Zhang Y, Bi Y. Spatial dual-electric fields for highly enhanced the solar water splitting of TiO<sub>2</sub> nanotube arrays [J]. Nano Energy, 2019, 57: 542-8.
- [10] Han M, Wang Z, Zhang Z, et al. Rationally constructing intercrossed CuInS<sub>2</sub> nanosheets on TiO<sub>2</sub> nanorods for efficient photoelectrochemical water splitting [J]. Chemical Engineering Science, 2023, 281: 119151.
